# Supplementary material
Source: publisher figshare collection journal article supplement (https://springernature.figshare.com/ndownloader/files/21929076)
Supplement: Supplementary file 1 [file 21929076]

**Additional material**

**Table S1**. Principal Component Results

|  | Positive psychological capital | Risk-taking and resourceful | Long-term focused and adventurous | Self-reliant and resilient |
| --- | --- | --- | --- | --- |
| I am confident myself as a farmer | **0.769** | 0.119 | 0.061 | 0.060 |
| I am confident in farming as a way of life | **0.766** | 0.150 | 0.143 | -0.066 |
| I have power to affect the outcome of my farming | **0.370** | **0.467** | **0.316** | -0.103 |
| I am optimistic about the future of agriculture in your area | **0.815** | 0.042 | 0.005 | 0.074 |
| I do not give us easily | **0.453** | **0.321** | 0.275 | **0.360** |
| I am willing to take more risks than other farmers in my community | 0.269 | **0.761** | 0.114 | -0.126 |
| I have hope that the quality of life will get better | **0.748** | 0.076 | 0.070 | 0.107 |
| I am willing to forgo a profit opportunity in the short-run in order to benefit from potential profits in the long-run | 0.080 | -0.185 | **0.815** | 0.000 |
| I am willing to try new ideas even without full knowledge about the possible outcome | 0.090 | 0.293 | **0.681** | 0.078 |
| I am able to cope with shocks such as drought and other natural disasters | 0.187 | **0.397** | 0.026 | **0.584** |
| I would not be farming if I had an alternative source of income | -0.030 | **0.704** | -0.081 | 0.132 |
| The government is responsible for the wellbeing of rural households | 0.016 | 0.190 | -0.018 | **-0.839** |
| **Eigenvalues** | 2.867 | 1.754 | 1.352 | 1.249 |
| **% of variance** | 23.895 | 14.613 | 11.269 | 10.410 |
| **Cumulative %** | 23.895 | 38.507 | 49.776 | 60.186 |

**Table S2.** Cluster Analysis ANOVA table output

|  | Cluster | | Error |  | F | Sig. |
| --- | --- | --- | --- | --- | --- | --- |
|  | Mean Square | df | Mean Square | df |  |  |
| Endowed with positive psychological capital | 65.359 | 2 | 0.717 | 455 | 91.143 | 0.000 |
| Risk taking and resourceful | 42.778 | 2 | 0.816 | 455 | 52.401 | 0.000 |
| Long-term focused and adventurous | 20.807 | 2 | 0.913 | 455 | 22.792 | 0.000 |
| Self-reliant and resilient | 155.027 | 2 | 0.323 | 455 | 480.022 | 0.000 |
